# Supplementary material
Source: PubMed Central journal article supplement (PMC9957856)
Supplement: NIHMS1829563-supplement-1829563_Sup_Material.pdf [file NIHMS1829563-supplement-1829563_Sup_Material.pdf]

**Supplementary Table 1. Summary of examples of potential applications.**

| <b>Feature</b>                                                            | <b>Applications</b>                                                                                                                                                                                                                                                                                                                                                                                                                                                                                                                                                                                                                                                                                                                                                                                                                                                         |
|---------------------------------------------------------------------------|-----------------------------------------------------------------------------------------------------------------------------------------------------------------------------------------------------------------------------------------------------------------------------------------------------------------------------------------------------------------------------------------------------------------------------------------------------------------------------------------------------------------------------------------------------------------------------------------------------------------------------------------------------------------------------------------------------------------------------------------------------------------------------------------------------------------------------------------------------------------------------|
| High differentiation efficiency                                           | <ol style="list-style-type: none"> <li>1. Scalable production UB progenitors</li> <li>2. Easy for other labs to adopt and utilize methods</li> <li>3. Tissue engineering of collecting ducts and/or ureteric tissue</li> </ol>                                                                                                                                                                                                                                                                                                                                                                                                                                                                                                                                                                                                                                              |
| Robust branching morphogenesis                                            | <ol style="list-style-type: none"> <li>1. Gain mechanistic insights into regulation of human UB branching and patterning</li> <li>2. Model congenital anomalies of the kidney and urinary tract (CAKUT)               <ol style="list-style-type: none"> <li>a) Monogenic causes</li> <li>b) Teratogens (i.e. ACE inhibitors)</li> </ol> </li> <li>3. Tissue engineering of complex kidney organoids based on UB interactions with metanephric cells</li> </ol>                                                                                                                                                                                                                                                                                                                                                                                                             |
| Collecting duct development, cell fate decisions, and cytodifferentiation | <ol style="list-style-type: none"> <li>1. Understand basic mechanisms of formation of radial polarity (corticomedullary axis)</li> <li>2. Interrogate process of principal cell maturation</li> <li>3. Identify signals and pathways involved in PC vs IC fate determination (also Lithium-induced DI)</li> </ol>                                                                                                                                                                                                                                                                                                                                                                                                                                                                                                                                                           |
| Functional Principal Cells                                                | <ol style="list-style-type: none"> <li>1. Interrogation of physiology and homeostasis:               <ol style="list-style-type: none"> <li>a) Cell biology of ion transport</li> <li>b) Mechanisms of hormone regulation</li> <li>c) Develop assays for potassium secretion</li> </ol> </li> <li>2. Disease Modeling:               <ol style="list-style-type: none"> <li>a) Salt sensitivity/primary hypertension</li> <li>b) Monogenic hypertension (e.g. Liddle)</li> <li>c) Electrolyte wasting disorders (pseudohypoaldosteronism)</li> <li>d) Water disequilibrium (Lithium-induced nephrogenic DI) (Congenital nephrogenic DI)</li> </ol> </li> <li>3. Study effect of potential pharmacologic agents on different aspects of principal function</li> <li>4. Engineering 3D perfusable CD tubules for modeling physiology and for regenerative medicine</li> </ol> |
| Functional Intercalated Cells                                             | <ol style="list-style-type: none"> <li>1. Basic IC development and physiology               <ol style="list-style-type: none"> <li>a) A-IC vs B-IC determination/polarity</li> <li>b) Mechanisms of acid/base secretion</li> </ol> </li> <li>2. Disease Modeling:               <ol style="list-style-type: none"> <li>a) Distal renal tubular acidosis</li> <li>b) Kidney stone disorders</li> </ol> </li> <li>3. Identify candidate molecules that impact urine acidification or alkalinization.</li> </ol>                                                                                                                                                                                                                                                                                                                                                               |

**Supplementary Table 2. QPCR primer sequences**

| <b>Gene</b> | <b>Forward primer</b>   | <b>Reverse primer</b>   |
|-------------|-------------------------|-------------------------|
| AQP2        | CACGTCTCCGTTCTCCGAG     | CTGTTGCTGAGAGCATTGACA   |
| CDH1        | CGAGAGCTACACGTTACGCG    | GGGTGTCGAGGGAAAAATAGG   |
| ELF5        | TAGGGAACAAGGAATTTTTCGGG | GTACACTAACCTTCGGTCAACC  |
| EMX2        | CGGCACTCAGCTACGCTAAC    | CAAGTCCGGGTTGGAGTAGAC   |
| EYA1        | GTCACAGTCTCAGTCACCTGG   | GGGATAAGACGGATAGTCCTGC  |
| FOXF1       | CCCAGCATGTGTGACCGAAA    | ATCACGCAAGGCTTGATGTCT   |
| GAPDH       | CCCATCACCATCTTCCAGGAG   | CTTCTCCATGGTGGTGAAGACG  |
| GATA3       | GCCCCTCATTAAAGCCCAAG    | TTGTGGTGGTCTGACAGTTCCG  |
| HNF1B       | TCAGCTGCTGTTTCTCTTTCCA  | GCGGCGCATCTTCTTGTT      |
| HOXA11      | TGCCAAGTTGTACTTACTACGTC | GTTGGAGGAGTAGGAGTATGTCA |
| HOXB7       | AACTTCCGGATCTACCCCTG    | CTTTCTCCAGCTCCAGGGTC    |
| LHX1        | CCTGGACCGCTTTTCTCTTGAA  | ACCGAAACACCGGAAGAAGTC   |
| MIXL1       | GGCGTCAGAGTGGGAAATCC    | GGCAGGCAGTTCACATCTACC   |
| NANOG       | TGATTTGTGGGCCTGAAGAAA   | GAGGCATCTCAGCAGAAGACA   |
| OSR1        | CCCATTTCCGGTAGTTGCAGT   | CCTTCAGCTAAAGCCCCAG     |
| PAX2        | TGTCAGCAAATCCTGGGCAG    | GTCGGGTTCTGTGCTTTGTATT  |
| PAX8        | AAGTGCAGCAACCATTCAACC   | CTGCTCTGTGAGTCAATGCTTA  |
| RET         | ACACGGCTGCATGAGAACA     | GCCCTCACGAAGGGATGTG     |
| SCNN1B      | AGACAACCACAATGGCTTAACA  | TGAGGCTACATAGTCTCATGGC  |
| SCNN1G      | GCACCCGGAGAGAAGATCAAA   | TACCACCGCATCAGCTCTTTA   |
| SIX2        | AAGGCACACTACATCGAGGC    | CACGCTGCGACTCTTTTCC     |
| SOX17       | GTGGACCGCACGGAATTTG     | GGAGATTCACACCGGAGTCA    |
| SOX9        | AGCGAACGCACATCAAGAC     | CTGTAGGCGATCTGTTGGGG    |
| TBXT        | TATGAGCCTCGAATCCACATAGT | CCTCGTTCTGATAAGCAGTCAC  |
| WNT11       | GACCTCAAGACCCGATACCTG   | TAGACGAGTTCGGAGTCCTTC   |
| WNT7B       | GAAGCAGGGCTACTACAACCA   | CGGCCTCATTGTTATGCAGGT   |
| WNT9B       | TGTGCGGTGACAACCTCAAG    | ACAGGAGCCTGATACGCCAT    |
| WT1         | GTGACTTCAAGGACTGTGAACG  | CGGGAGAACTTTGCTGACAA    |

**Supplementary Table 3. Primary antibodies**

| <b>Antigen</b> | <b>Host species</b> | <b>Manufacture</b>  | <b>Cat. No.</b> | <b>Dilution</b> |
|----------------|---------------------|---------------------|-----------------|-----------------|
| AQP2           | Mouse               | Santa Cruz          | sc-515770       | 1:200           |
| AQP2           | Rabbit              | Millipore           | 178612          | 1:200           |
| ALDH1A3        | Rabbit              | Novus               | NBP2-15339      | 1:200           |
| ATP6V1B1       | Rabbit              | Sigma               | HPA031847       | 1:200           |
| CDH1           | Mouse               | BD Biosciences      | 610181          | 1:500           |
| EMX2           | Rabbit              | Sigma               | HPA065294       | 1:200           |
| FOXI1          | Goat                | Abcam               | ab20454         | 1:200           |
| SCNN1B         | Rabbit              | Gift from L. Palmer |                 | 1:100           |
| GATA3          | Rabbit              | Cell Signaling      | D13C9           | 1:300           |
| HNF1B          | Rabbit              | Sigma               | HPA002083       | 1:200           |
| GRHL2          | Rabbit              | Sigma               | HPA004820       | 1:200           |
| HOXB7          | Mouse               | R&D Systems         | MAB8040         | 1:200           |
| KRT8           | Mouse               | Santa Cruz          | sc-8020         | 1:100           |
| LHX1           | Rabbit              | Abcam               | ab229474        | 1:200           |
| Nuclei (hu)    | Mouse               | Novus               | NBP2-34342      | 1:500           |
| PAX2           | Rabbit              | BioLegend           | PRB-276P        | 1:200           |
| PAX2           | Goat                | R&D Systems         | AF3364          | 1:200           |
| PAX8           | Rabbit              | Abcam               | ab189249        | 1:400           |
| RET            | Goat                | R&D Systems         | AF-1485         | 1:200           |
| SOX9           | Rabbit              | Novusbio            | NBP1-85551      | 1:200           |
| SLC26A4        | Rabbit              | Sigma               | HPA042860       | 1:200           |
| SLC4A1         | Rabbit              | Sigma               | HPA015584       | 1:200           |
| TBXT           | Goat                | R&D Systems         | AF2085          | 1:200           |
